# Supplementary material
Source: PubMed Central journal article supplement (PMC8455279)
Supplement: ASN.2020111558SupplementaryData.pdf [file ASN.2020111558SupplementaryData.pdf]

## **Supplementary Material Table of Contents**

**Table S1** Definitions of epitopes, KIR haplotypes and missing self

**Table S2** Pretransplant determinants of MVI: univariable analysis (N=890 transplantations)

**Table S3** The association between NK cell stimuli and kidney transplant rejection phenotypes (N=3476 biopsies)

**Table S4** The association between missing self and individual histological lesions (N=3476 biopsies)

**Table S5** Association of missing self and peritransplantation factors with early occurrence of MVI (n=748 biopsies)

**Table S6.** Risk factors for development of MVI after CMV disease (n=72 transplantations)

**Table S7** Determinants of transplant glomerulopathy after diagnosis of MVI (N=190 cases)

**Table S8** Predictors of allograft failure after diagnosis of MVI (N=222 cases)

**Figure S1** Study cohort overview

**Figure S2** Tacrolimus exposure associates with decreased risk of early MVI in transplantations with missing self (n=748 biopsies)

**Figure S3** Missing self does not influence allograft function after MVI diagnosis (N=222 cases)

## Supplementary Tables

**Table S1 Definitions of epitopes, KIR haplotypes and missing self**

| <b>Epitope</b>           | <b>Corresponding HLA antigens</b>                                                             |
|--------------------------|-----------------------------------------------------------------------------------------------|
| Bw4                      | A23, A24, A25, A32, B13, B27, B37, B38, B44, B47, B49, B51, B52, B53, B57, B58, B59, B63, B77 |
| C1                       | Cw1, Cw3, Cw7, Cw8, Cw12, Cw14, Cw16                                                          |
| C2                       | Cw2, Cw4, Cw5, Cw6, Cw15, Cw17, Cw18                                                          |
| <b>KIR haplotype</b>     | <b>Corresponding KIR genes</b>                                                                |
| BX haplotype             | Presence of either KIR2DL2, KIR2DL5, KIR2DS1, KIR2DS2, KIR2DS3, KIR2DS5, KIR3DS1              |
| AA haplotype             | Absence of BX haplotype-defining KIR genes                                                    |
| <b>Missing self type</b> | <b>Definition</b>                                                                             |
| A3/11                    | Recipient A3 or A11 positive AND recipient KIR3DL2 positive AND donor A3 and A11 negative     |
| Bw4                      | Recipient BW4 positive AND recipient KIR3DL1 positive AND donor Bw4 negative                  |
| C1/2DL2                  | Recipient C1 positive AND recipient KIR2DL2 positive AND donor C1 negative                    |
| C1/2DL3                  | Recipient C1 positive AND recipient KIR2DL3 positive AND donor C1 negative                    |
| C2                       | Recipient C2 positive AND recipient KIR2DL1 positive AND donor C2 negative                    |

**Table S2 Pretransplant determinants of MVI: univariable analysis (N=890 transplantations)**

| Parameter                                      | Patients | Events | HR   | 95% CI     | P                |
|------------------------------------------------|----------|--------|------|------------|------------------|
| Recipient age, per 1-year increment            | 890      | 222    | 1.00 | 0.99-1.01  | 0.764            |
| Recipient gender                               |          |        |      |            |                  |
| Male                                           | 538      | 118    | 1    |            |                  |
| Female                                         | 352      | 104    | 1.44 | 1.10-1.87  | <b>0.007</b>     |
| Missing self                                   |          |        |      |            |                  |
| no                                             | 501      | 114    | 1    |            |                  |
| yes                                            | 389      | 108    | 1.19 | 0.91-1.54  | 0.207            |
| Missing self type                              |          |        |      |            |                  |
| A3/A11                                         | 124      | 35     | 1.11 | 0.77-1.59  | 0.590            |
| Bw4                                            | 120      | 36     | 1.30 | 0.91-1.85  | 0.155            |
| C1/2DL2                                        | 37       | 14     | 1.75 | 1.02-3.02  | <b>0.042</b>     |
| C1/2DL3                                        | 78       | 25     | 1.39 | 0.92-2.11  | 0.122            |
| C2                                             | 147      | 45     | 1.27 | 0.92-1.77  | 0.148            |
| Missing self number, per 1-unit increase       | 890      | 222    | 1.29 | 1.08-1.53  | <b>0.004</b>     |
| 0                                              | 501      | 114    | 1    |            |                  |
| 1                                              | 281      | 67     | 0.98 | 0.72-1.32  | 0.869            |
| 2                                              | 99       | 35     | 1.66 | 1.13-2.42  | <b>0.009</b>     |
| 3                                              | 9        | 6      | 3.95 | 1.74-8.98  | <b>0.001</b>     |
| Kir haplotype                                  |          |        |      |            |                  |
| AA                                             | 281      | 65     | 1    |            |                  |
| BX                                             | 609      | 157    | 1.13 | 0.84-1.50  | 0.427            |
| Pretransplant HLA-DSA                          |          |        |      |            |                  |
| no                                             | 796      | 158    |      |            |                  |
| yes                                            | 94       | 64     | 6.11 | 4.54-8.23  | <b>&lt;0.001</b> |
| Pretransplant HLA-DSA class                    |          |        |      |            |                  |
| None                                           | 796      | 158    | 1    |            |                  |
| Class I                                        | 33       | 21     | 4.90 | 3.10-7.74  | <b>&lt;0.001</b> |
| Class II                                       | 40       | 28     | 7.57 | 5.02-11.42 | <b>&lt;0.001</b> |
| Class I + II                                   | 21       | 15     | 6.13 | 3.59-10.45 | <b>&lt;0.001</b> |
| HLA-A/B/DR/DQ mismatches, per 1-unit increment | 890      | 222    | 1.24 | 1.14-1.35  | <b>&lt;0.001</b> |
| HLA-A mismatches, per 1-unit increment         | 890      | 222    | 1.29 | 1.07-1.56  | <b>0.008</b>     |
| HLA-B mismatches, per 1-unit increment         | 890      | 222    | 1.47 | 1.19-1.81  | <b>&lt;0.001</b> |
| HLA-C mismatches, per 1-unit increment         | 890      | 222    | 1.33 | 1.09-1.61  | <b>0.005</b>     |
| HLA-DRB1 mismatches, per 1-unit increment      | 890      | 222    | 1.45 | 1.14-1.85  | <b>0.002</b>     |
| HLA-DQB1 mismatches, per 1-unit increment      | 890      | 222    | 1.51 | 1.22-1.86  | <b>&lt;0.001</b> |
| Retransplantation                              |          |        |      |            |                  |
| no                                             | 764      | 177    | 1    |            |                  |
| yes                                            | 126      | 45     | 1.81 | 1.30-2.52  | <b>&lt;0.001</b> |
| CMV status                                     |          |        |      |            |                  |
| D-/R-                                          | 246      | 42     | 1    |            |                  |
| D-/R+                                          | 262      | 71     | 1.71 | 1.16-2.51  | <b>0.006</b>     |
| D+/R-                                          | 182      | 48     | 1.69 | 1.12-2.57  | <b>0.014</b>     |

|                                          |     |     |      |           |                  |
|------------------------------------------|-----|-----|------|-----------|------------------|
| D+/R+                                    | 200 | 61  | 2.06 | 1.38-3.06 | <b>&lt;0.001</b> |
| Donor age, per 1-year increment          | 890 | 222 | 1.01 | 1.00-1.02 | <b>0.018</b>     |
| Donor gender                             |     |     |      |           |                  |
| Male                                     | 473 | 117 | 1    |           |                  |
| Female                                   | 417 | 105 | 1.08 | 0.83-1.40 | 0.580            |
| Donation type                            |     |     |      |           |                  |
| Living donation                          | 42  | 9   | 1    |           |                  |
| Donation after brain death               | 698 | 181 | 1.37 | 0.70-2.67 | 0.362            |
| Donation after circulatory death         | 150 | 32  | 1.11 | 0.53-2.32 | 0.787            |
| Cold ischemia time, per 1-hour increment | 890 | 222 | 1.02 | 0.99-1.04 | 0.169            |

Univariable Cox proportional hazards analysis of MVI incidence after transplantation. MVI: microvascular inflammation, HR: hazard ratio, CI: confidence interval, HLA-DSA: donor-specific anti-HLA antibodies, D: donor, R: recipient. Bold P-values indicate statistical significance.

**Table S3 The association between NK cell stimuli and kidney transplant rejection phenotypes (N=3476 biopsies)**

The estimates and confidence bounds are based on a logistic mixed effect regression model with random intercepts and a linear fixed effect of posttransplant time, corrected for HLA class I and class II mismatch number, donor age, recipient sex and repeat transplantation. All posttransplant biopsies (n=3476) were used in the analysis. Missing self is defined as presence of 2 or more types. MVI: microvascular inflammation, ABMR: antibody-mediated rejection per Banff 2019 definition, TCMR: T-cell mediated rejection, OR: odds ratio, CI: confidence interval, HLA-DSA: donor-specific anti-HLA antibodies, KIR: killer cell immunoglobulin-like receptor. Bold P-values indicate statistical significance

| Parameter               | MVI  |            |                  | ABMR histology |            |                  | TCMR |           |              | TCMR or borderline changes |           |                  |
|-------------------------|------|------------|------------------|----------------|------------|------------------|------|-----------|--------------|----------------------------|-----------|------------------|
|                         | OR   | 95% CI     | P                | OR             | 95% CI     | P                | OR   | 95% CI    | P            | OR                         | 95% CI    | P                |
| Missing self            | 2.16 | 1.26-3.72  | <b>0.005</b>     | 2.27           | 1.28-4.01  | <b>0.005</b>     | 1.39 | 0.82-2.34 | 0.222        | 1.29                       | 0.85-1.97 | 0.238            |
| HLA-DSA                 | 8.82 | 5.24-14.87 | <b>&lt;0.001</b> | 28.32          | 15.7-50.99 | <b>&lt;0.001</b> | 2.23 | 1.30-3.82 | <b>0.003</b> | 2.13                       | 1.38-3.29 | <b>&lt;0.001</b> |
| Prior CMV disease       | 2.67 | 1.46-4.87  | <b>0.001</b>     | 2.68           | 1.40-5.21  | <b>0.003</b>     | 1.54 | 0.85-2.81 | 0.157        | 1.75                       | 1.10-2.79 | <b>0.018</b>     |
| Cold ischemia time (hr) | 1.00 | 0.96-1.03  | 0.828            | 1.00           | 0.96-1.04  | 0.936            | 0.99 | 0.95-1.02 | 0.465        | 1.00                       | 0.98-1.03 | 0.926            |
| KIR BX haplotype        | 1.17 | 0.77-1.77  | 0.475            | 0.91           | 0.59-1.42  | 0.686            | 1.11 | 0.75-1.63 | 0.606        | 1.19                       | 0.87-1.62 | 0.284            |

**Table S4 The association between missing self and individual histological lesions (N=3476 biopsies)**

The estimates and confidence bounds are based on a logistic mixed effect regression model with random intercepts and a linear fixed effect of posttransplant time. Missing self was defined as presence of 2 or more subtypes. Binary definitions were used for presence (Banff score > 0) or absence (Banff score=0) of the histological lesions. The multivariable model is corrected for class I and class II HLA mismatch number, donor age, recipient sex, repeat transplantation, donor-specific antibodies and preceding CMV disease. All posttransplant biopsies (n=3476) were used in the analysis. Bold P-values indicate statistical significance. OR: odds ratio, CI: confidence interval.

| Parameter                              | Univariable analysis |           |              | Multivariable analysis |           |              |
|----------------------------------------|----------------------|-----------|--------------|------------------------|-----------|--------------|
|                                        | OR                   | 95% CI    | P            | OR                     | 95% CI    | P            |
| Intimal arteritis                      | 2.23                 | 1.31-3.79 | <b>0.003</b> | 2.27                   | 1.33-3.87 | <b>0.003</b> |
| Glomerulitis                           | 2.27                 | 1.35-3.84 | <b>0.002</b> | 1.89                   | 1.14-3.15 | <b>0.014</b> |
| Peritubular capillaritis               | 1.80                 | 1.17-2.77 | <b>0.008</b> | 1.54                   | 0.95-2.54 | 0.079        |
| Interstitial inflammation              | 1.45                 | 1.01-2.07 | <b>0.043</b> | 1.29                   | 0.83-2.00 | 0.263        |
| C4d deposition peritubular capillaries | 1.43                 | 0.95-2.17 | 0.091        | 1.27                   | 0.85-1.92 | 0.246        |
| Transplant glomerulopathy              | 1.11                 | 0.31-4.03 | 0.874        | 1.23                   | 0.48-3.17 | 0.672        |
| Arterial fibro-intimal thickening      | 1.06                 | 0.80-1.39 | 0.704        | 1.09                   | 0.78-1.31 | 0.949        |
| Tubulitis                              | 1.04                 | 0.77-1.40 | 0.784        | 0.96                   | 0.72-1.29 | 0.780        |
| Tubular atrophy                        | 0.93                 | 0.70-1.24 | 0.624        | 0.89                   | 0.65-1.22 | 0.474        |
| Arteriolar hyalinosis                  | 0.86                 | 0.65-1.15 | 0.303        | 0.81                   | 0.59-1.11 | 0.188        |
| Interstitial fibrosis                  | 0.85                 | 0.65-1.11 | 0.223        | 0.79                   | 0.57-1.08 | 0.132        |

**Table S5 Association of missing self and peritransplantation factors with early occurrence of MVI (n=748 biopsies)**

The first biopsy within three posttransplant months was included for transplantations with available information on tacrolimus trough levels. The estimates and confidence bounds are based on a logistic regression model. The multivariable model is corrected for class I and class II HLA mismatch number, donor and recipient age, recipient sex, previous transplantation and days after transplantation. Missing self is defined as presence of 2 or more types. HLA-DSA: donor-specific anti-HLA antibodies, OR: odds ratio, CI: confidence interval.

| Parameter                                                | Univariable analysis |            |        | Multivariable analysis |            |        |
|----------------------------------------------------------|----------------------|------------|--------|------------------------|------------|--------|
|                                                          | OR                   | 95% CI     | P      | OR                     | 95% CI     | P      |
| Missing self                                             | 2.53                 | 1.50-4.26  | <0.001 | 3.25                   | 1.71-6.18  | <0.001 |
| HLA-DSA                                                  | 9.42                 | 5.73-15.47 | <0.001 | 9.73                   | 5.35-17.7  | <0.001 |
| Cold ischemia time,<br>per 1 hour increase               | 1.04                 | 1.01-1.08  | 0.024  | 1.02                   | 0.97-1.08  | 0.415  |
| Delayed graft function                                   | 2.38                 | 1.48-3.84  | <0.001 | 1.57                   | 0.88-2.81  | 0.129  |
| Induction therapy                                        | 1.23                 | 0.81-1.86  | 0.330  | 0.78                   | 0.45-1.34  | 0.365  |
| Average tacrolimus trough level,<br>per 1 ng/ml increase | 1.06                 | 0.96-1.16  | 0.254  | 0.89                   | 0.80-0.99  | 0.040  |
| Previous CMV disease                                     | 1.99                 | 0.40-10.01 | 0.402  | 4.13                   | 0.72-23.77 | 0.112  |

**Table S6. Risk factors for development of MVI after CMV disease (n=72 transplantations)**

Cox proportional hazards analysis of MVI incidence after the first episode of CMV disease, in transplantation with further histological follow-up and without previous occurrence of MVI. HLA-DSA: anti-HLA donor-specific antibodies, HR: hazard ratio, CI: confidence interval.

| Parameter                                  |          |        | Univariable |            |       | Multivariable |            |       |
|--------------------------------------------|----------|--------|-------------|------------|-------|---------------|------------|-------|
|                                            | Patients | Events | HR          | 95% CI     | P     | HR            | 95% CI     | P     |
| Reduction of maintenance immunosuppression |          |        |             |            |       |               |            |       |
| No                                         | 51       | 15     | 1           |            |       | 1             |            |       |
| Yes                                        | 21       | 7      | 1.27        | 0.52-3.12  | 0.600 | 1.49          | 0.59-3.74  | 0.396 |
| HLA-DSA                                    |          |        |             |            |       |               |            |       |
| No                                         | 69       | 20     | 1           |            |       | 1             |            |       |
| Yes                                        | 3        | 2      | 2.79        | 0.64-12.22 | 0.174 | 3.22          | 0.66-15.70 | 0.148 |
| Missing self types                         |          |        |             |            |       |               |            |       |
| 0-1                                        | 59       | 18     | 1           |            |       | 1             |            |       |
| 2-3                                        | 13       | 4      | 1.02        | 0.35-3.03  | 0.965 | 0.87          | 0.28-2.68  | 0.810 |
| Primo infection                            |          |        |             |            |       |               |            |       |
| No                                         | 9        | 2      | 1           |            |       | 1             |            |       |
| Yes                                        | 63       | 20     | 1.54        | 0.36-6.59  | 0.562 | 0.78          | 0.16-3.77  | 0.755 |
| Induction therapy at transplantation       |          |        |             |            |       |               |            |       |
| No                                         | 51       | 17     | 1           |            |       | 1             |            |       |
| Yes                                        | 21       | 5      | 0.67        | 0.25-1.81  | 0.670 | 0.52          | 0.18-1.49  | 0.223 |



**Table S7 Determinants of transplant glomerulopathy after diagnosis of MVI (N=190 cases)**

Univariable and multivariable Cox proportional hazards analysis of transplant glomerulopathy incidence after the first biopsy showing MVI, corrected for time after transplantation. Cases with transplant glomerulopathy at the time of MVI diagnosis, without subsequent histological follow-up or without information on previous CMV disease were excluded from the analysis (n=32). Bold P-values indicate statistical significance. MVI: microvascular inflammation, HR: hazard ratio, CI: confidence interval, HLA-DSA: donor-specific anti-HLA antibodies, TCMR: T-cell mediated rejection, eGFR: estimated glomerular filtration rate.

| Parameter                                |          |        | Univariable |           |              | Multivariable |           |              |
|------------------------------------------|----------|--------|-------------|-----------|--------------|---------------|-----------|--------------|
|                                          | Patients | Events | HR          | 95% CI    | P            | HR            | 95% CI    | P            |
| Missing self types                       |          |        |             |           |              |               |           |              |
| 0-1                                      | 154      | 22     | 1           |           |              | 1             |           |              |
| 2-3                                      | 36       | 9      | 2.04        | 0.92-4.41 | 0.080        | 2.51          | 1.12-5.62 | <b>0.025</b> |
| HLA-DSA                                  |          |        |             |           |              |               |           |              |
| no                                       | 127      | 14     | 1           |           |              | 1             |           |              |
| yes                                      | 63       | 17     | 2.91        | 1.41-6.00 | <b>0.004</b> | 3.55          | 1.59-7.92 | <b>0.002</b> |
| TCMR                                     |          |        |             |           |              |               |           |              |
| no                                       | 107      | 19     | 1           |           |              |               |           |              |
| yes                                      | 83       | 12     | 0.85        | 0.40-1.79 | 0.665        | 0.90          | 0.37-2.19 | 0.816        |
| Prior CMV disease                        |          |        |             |           |              |               |           |              |
| No                                       | 173      | 29     | 1           |           |              | 1             |           |              |
| yes                                      | 17       | 2      | 0.82        | 0.19-3.45 | 0.455        | 1.99          | 0.41-9.80 | 0.396        |
| eGFR                                     |          |        |             |           |              |               |           |              |
| per 1 ml/min/1.73m <sup>2</sup> increase | 190      | 31     | 1.00        | 0.98-1.01 | 0.556        | 0.99          | 0.97-1.02 | 0.993        |
| Indication biopsy                        |          |        |             |           |              |               |           |              |
| no                                       | 83       | 12     | 1           |           |              | 1             |           |              |
| yes                                      | 107      | 19     | 1.24        | 0.59-2.60 | 0.570        | 1.06          | 0.38-2.91 | 0.914        |

**Table S8 Predictors of allograft failure after diagnosis of MVI (N=222 cases)**

Univariable and multivariable Cox proportional hazards analysis of allograft survival after the first biopsy showing MVI, corrected for time after transplantation. Bold P-values indicate statistical significance. MVI: microvascular inflammation, HR: hazard ratio, CI: confidence interval, HLA-DSA: donor-specific anti-HLA antibodies, TCMR: T-cell mediated rejection, eGFR: estimated glomerular filtration rate.

| Parameter                                |          |        | Univariable |           |                  | Multivariable |           |              |
|------------------------------------------|----------|--------|-------------|-----------|------------------|---------------|-----------|--------------|
|                                          | Patients | Events | HR          | 95% CI    | P                | HR            | 95% CI    | P            |
| Missing self types                       |          |        |             |           |                  |               |           |              |
| 0-1                                      | 181      | 47     | 1           |           |                  | 1             |           |              |
| 2-3                                      | 41       | 12     | 1.14        | 0.60-2.14 | 0.695            | 1.23          | 0.65-2.33 | 0.526        |
| HLA-DSA                                  |          |        |             |           |                  |               |           |              |
| no                                       | 146      | 30     | 1           |           |                  | 1             |           |              |
| yes                                      | 76       | 29     | 2.34        | 1.40-3.92 | <b>0.001</b>     | 2.31          | 1.36-3.94 | <b>0.002</b> |
| TCMR                                     |          |        |             |           |                  |               |           |              |
| no                                       | 129      | 30     | 1           |           |                  |               |           |              |
| yes                                      | 93       | 29     | 1.28        | 0.77-2.14 | 0.338            | 0.96          | 0.52-1.79 | 0.964        |
| Prior CMV disease                        |          |        |             |           |                  |               |           |              |
| No                                       | 201      | 56     | 1           |           |                  | 1             |           |              |
| yes                                      | 21       | 3      | 0.50        | 0.16-1.62 | 0.507            | 0.90          | 0.27-3.04 | 0.871        |
| eGFR                                     |          |        |             |           |                  |               |           |              |
| per 1 ml/min/1.73m <sup>2</sup> increase | 222      | 59     | 0.97        | 0.96-0.99 | <b>&lt;0.001</b> | 0.96          | 0.94-0.99 | <b>0.001</b> |
| Indication biopsy                        |          |        |             |           |                  |               |           |              |
| no                                       | 100      | 19     | 1           |           |                  | 1             |           |              |
| yes                                      | 122      | 40     | 1.90        | 1.10-3.28 | <b>0.022</b>     | 0.78          | 0.35-1.74 | 0.547        |

Supplementary Figures

Figure S1 Study cohort overview MVI: microvascular inflammation.

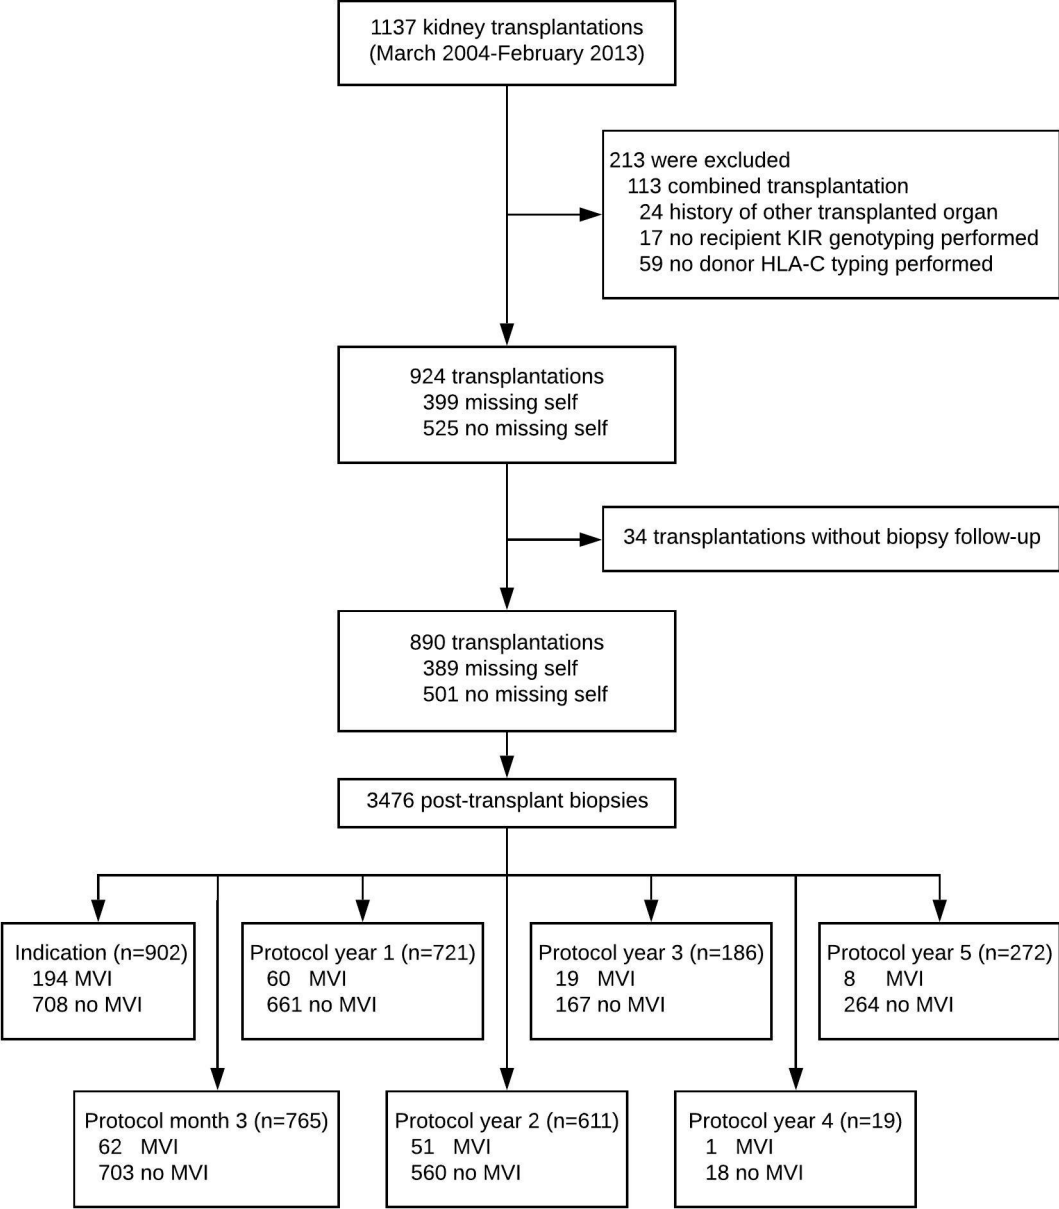

**Figure S2 Tacrolimus exposure associates with decreased risk of early MVI in transplantations with missing self (n=748 biopsies)**

The first biopsy within three posttransplant months was included for transplantations with tacrolimus as maintenance immunosuppression and  $\geq 5$  available trough levels. The estimates and confidence bounds are based on a logistic regression model. **a.** Odds ratio for MVI in function of the average tacrolimus exposure in presence (n=89) or absence (n=659) of high missing self. **b.** Odds ratio plot of the probability of MVI in the presence (n=86) or absence (n=662) of HLA-DSA. MVI: microvascular inflammation, HLA-DSA: donor-specific anti-HLA antibodies, Low MS:  $< 2$  missing self types, High MS:  $\geq 2$  missing self types

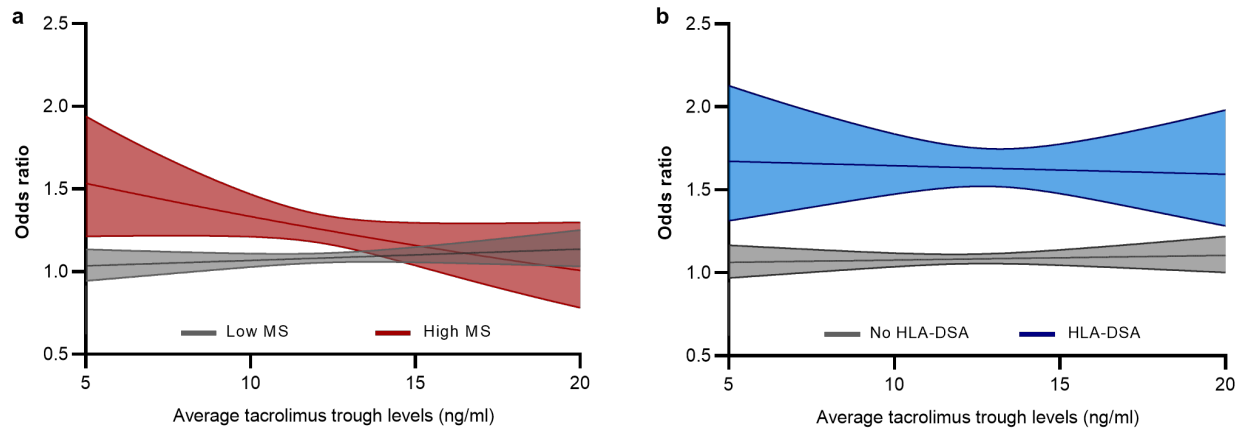

**Figure S3 Missing self does not influence allograft function after MVI diagnosis**

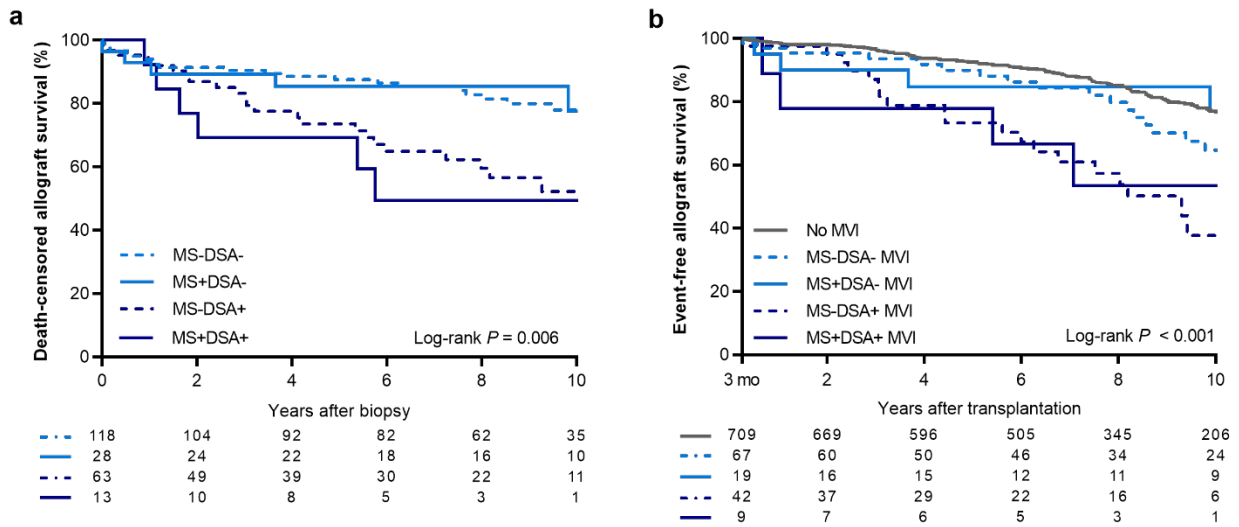

**a.** Kaplan-Meier survival curve of death-censored allograft failure after MVI diagnosis (N=222), stratified according to high or low missing self (i.e. 2-3 vs. 0-1 types) and HLA-DSA status (i.e. previous or current positivity). **b.** Landmark analysis of death-censored allograft failure or persistent 50% eGFR decline after the third posttransplant month, with stratification based on the presence of MVI within the first three months, high missing self and HLA-DSA status at three months. MVI: microvascular inflammation, HLA-DSA: anti-HLA donor-specific antibodies, MS: high missing self.
